# Supplementary material for: Genome sequencing of bacteria: sequencing, de novo assembly and rapid analysis using open source tools
Source: PubMed Central journal article supplement (PMC3618134; doi:10.1186/1471-2164-14-211), 2013-04-01

## Supplemental DATA

Supplemental File 1. Downloadable alignment file of various rRNA operons from *Alcanivorax borkumensis* SK2 genome. File contains the original finished genome annotation on rRNAs, re-annotation on finished genome sequence by RAST, IMG and PGAAP, and re-sequenced and re-annotated rRNA.

Supplemental Table 1. The raw sequencing output after Roche 454 sequencing when Rapid Library or General Library preparation was used. Genomes are denoted by strain identifier: SK2 – *Alcanivorax borkumensis* SK2; C103-3 – *Flavobacterium* sp. GOBB3-C103-3; 320 – *Marinomonas* sp. GOBB3-320; and 209 – *Flavobacterium* sp GOBB3-209.

|                      | Rapid Library |           |                | General Library |           |                |
|----------------------|---------------|-----------|----------------|-----------------|-----------|----------------|
|                      | No. of reads  | Bases     | Length Average | No. of reads    | Bases     | Length Average |
| SK2                  | 193979        | 45056983  | 232            | 195734          | 58905917  | 301            |
| C103-3               | 189321        | 46026298  | 243            | 220154          | 61492863  | 279            |
| 320                  | 259718        | 60998349  | 235            | 420872          | 126707997 | 301            |
| 209                  | 333197        | 80508738  | 242            | 280130          | 81090693  | 289            |
|                      |               |           |                |                 |           |                |
| Length Average       |               |           | 276.45         |                 |           | 333.55         |
| Length Std Deviation |               |           | 117            |                 |           | 128.08         |
| Median Reads Length  |               |           | 272            |                 |           | 359            |
| Total Bases          |               | 232590368 |                |                 | 328197470 |                |

Supplemental Table 2. Finished genome of *Alcanivorax borkumensis* SK2 (NC\_008260 in GenBank) compared to re-sequencing of the same strain. In reference mapping either Mosaik or MIRA3 was used. Statistics are given when RAST, PGAAP or IMG were used as annotation tool. CDS – coding sequences, lsu - large subunit rRNA, ssu – small subunit rRNA, tsu – 5S subunit rRNA.

|                         | Annotation tool | Total length, bp | Number of contigs | Numbers of |        |                                         |
|-------------------------|-----------------|------------------|-------------------|------------|--------|-----------------------------------------|
|                         |                 |                  |                   | CDS        | tRNA s | rRNA operons                            |
| Finished genome         |                 |                  |                   |            |        |                                         |
| NC_008260               | original*       | 3 120 143        | 1                 | 2755       | 42     | 3                                       |
|                         | RAST**          |                  |                   | 2910       | 42     | 3                                       |
|                         | PGAAP**         |                  |                   | 2901       | 42     | 3                                       |
| Reference mapping       |                 |                  |                   |            |        |                                         |
| Mosaik                  | RAST            | 3 102 433        | 18                | 6877       | 41     | none                                    |
|                         | PGAAP           |                  |                   | 4638       | 42     | 3 copies of tsu + ssu, lsu fragments*** |
|                         | IMG             |                  |                   | 6422       | 41     | fragments***                            |
| MIRA3                   | RAST            | 3 116 196        | 11                | 4878       | 43     | 3                                       |
|                         | PGAAP           |                  |                   | 3745       | 43     | 3 copies of tsu****                     |
|                         | IMG             |                  |                   | 5045       | 43     | 3                                       |
| <i>De novo</i> assembly |                 |                  |                   |            |        |                                         |
| MIRA3                   | RAST            | 3 114 849        | 27                | 2925       | 40     | 1 full operon, 5 fragmental rRNAs       |
|                         | PGAAP           |                  |                   | 2862       | 40     | 3 copies of tsu****                     |
|                         | IMG             |                  |                   | 2837       | 40     | 1 full operon, 8 fragmental rRNAs       |

\*- original annotation from [29] accessed from Genbank; \*\* - re-annotation on the finished genome using automated pipelines (RAST and PGAAP); \*\*\* - fragmental prediction only; \*\*\*\* - all three TSUs annotated correctly, and some fragments of ssu/lsu; \*\*\*\*\* - annotated only tsu's, failed in annotating any ssu and lsu.

Supplemental Table 3. Raw statistical comparison of *de novo* genome assemblies by MIRA3, Newbler or CABOG. SK2 – *Alcanivorax borkumensis* SK2; C103-3 – *Flavobacterium* sp. GOBB3-C103-3; 320 – *Marinomonas* sp. GOBB3-320; and 209 – *Flavobacterium* sp GOBB3-209.

N50 - is defined as the length contigs (N) for which 50% of all bases in the assembly are in a sequence of length L < N.

| Strain<br>Assembler | SK2     |         |        | 209     |         |         | C103-3  |         |         | 320     |         |         |       |     |       |     |       |     |       |     |       |     |
|---------------------|---------|---------|--------|---------|---------|---------|---------|---------|---------|---------|---------|---------|-------|-----|-------|-----|-------|-----|-------|-----|-------|-----|
|                     | MIRA3   | Newbler | CABOG  | MIRA3   | Newbler | CABOG   | MIRA3   | Newbler | CABOG   | MIRA3   | Newbler | CABOG   |       |     |       |     |       |     |       |     |       |     |
| Assembled bps       | 99 889  | 103 369 | 91 484 | 154 409 | 160 627 | 155 985 | 144 093 | 150 237 | 144 966 | 180 080 | 186 389 | 181 570 |       |     |       |     |       |     |       |     |       |     |
| Average             | 659     | 499     | 790    | 472     | 161     | 077     | 063     | 062     | 233     | 820     | 527     | 679     |       |     |       |     |       |     |       |     |       |     |
| recovery            | 32      | 31      | 29     | 64      | 66      | 44      | 33      | 35      | 28      | 37      | 39      | 34      |       |     |       |     |       |     |       |     |       |     |
| Size of             | 3 114   |         | 3 155  |         |         |         |         |         |         |         |         |         |       |     |       |     |       |     |       |     |       |     |
| consensus           | 849     | 3 100   | 791    | 926     | 2 301   | 590     | 2 290   | 996     | 864     | 250     | 4 200   | 016     | 4 115 | 993 | 3 479 | 714 | 4 511 | 028 | 4 447 | 860 | 4 434 | 168 |
| Nr of large         |         |         |        |         |         |         |         |         |         |         |         |         |       |     |       |     |       |     |       |     |       |     |
| contigs (>500bp)    | 31      | 35      | 670    | 37      | 56      | 595     | 108     | 150     | 1612    | 81      | 120     | 1422    |       |     |       |     |       |     |       |     |       |     |
| Largest contigi     | 293 122 | 291 961 | 23 122 | 350 125 | 236 138 | 4 176   | 224 076 | 197 209 | 21 222  | 507 454 | 255 787 | 16 870  |       |     |       |     |       |     |       |     |       |     |
| N50                 | 214 864 | 181 385 | 6 311  | 103 296 | 78 664  | 1 448   | 70 240  | 57 040  | 2 346   | 100 024 | 91 292  | 3 832   |       |     |       |     |       |     |       |     |       |     |

Supplemental Figure 1. Introduction of artificial stop codons into reference mapped annotation of *A. borkumensis* SK2. As an example, the aconitase A CDS is broken into several CDSs. A. Comparison between NC\_008260 in GenBank with re-sequenced and mapped assembly. B. Artificial deletion is introduced into the homopolymeric region because there is no 100% consensus on reads of one nucleotide. C. Difference between single reads from “problematic” region.

Supplemental Figure 1

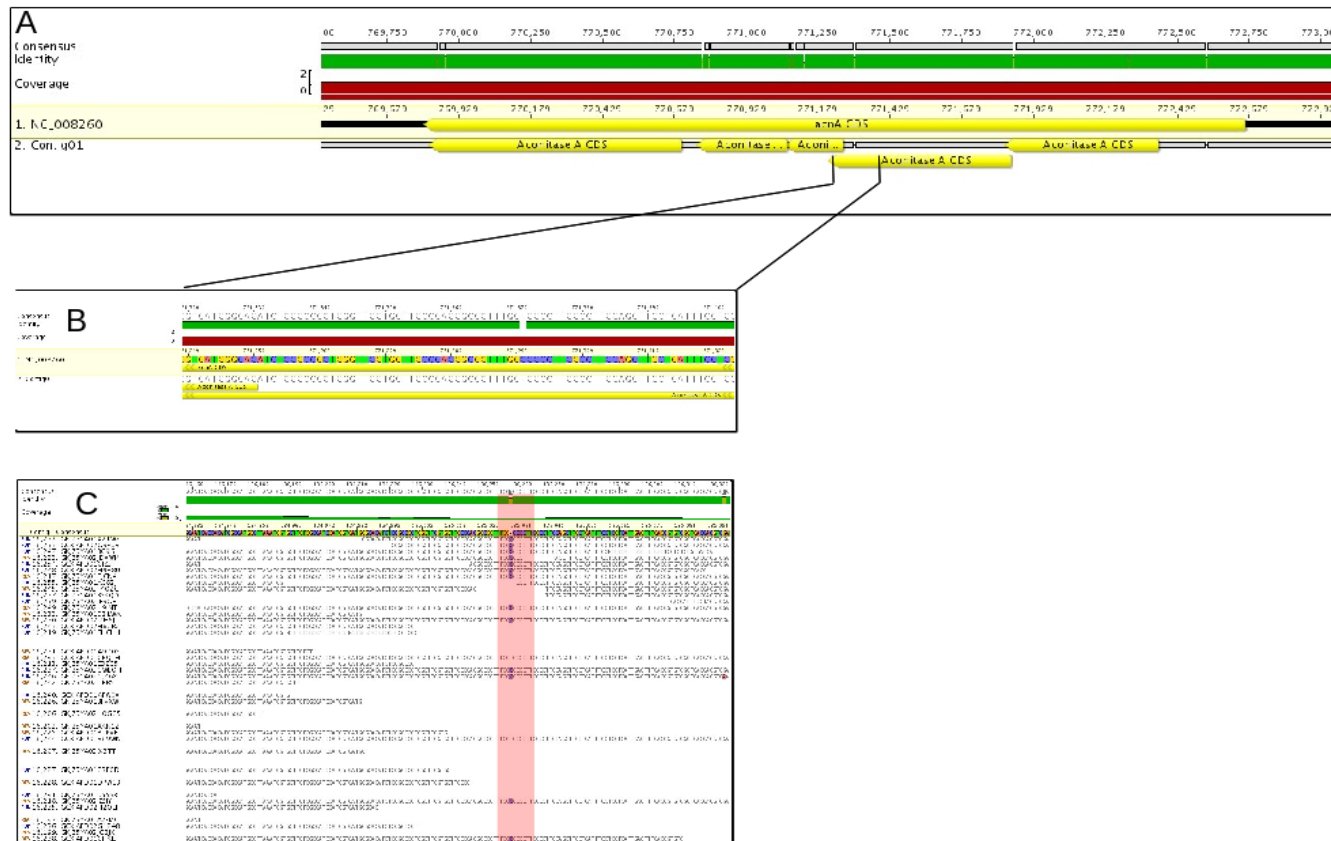

Supplement: 1471-2164-14-211-S1.pdf [file 1471-2164-14-211-S1.pdf]
